# Supplementary material
Source: Springer Nature journal article supplement (https://www.springermedizin.de/resource/supplementary/12967_2013_1786_MOESM3_ESM.pdf/9574878)

# Supplemental Figure 3.

**A**

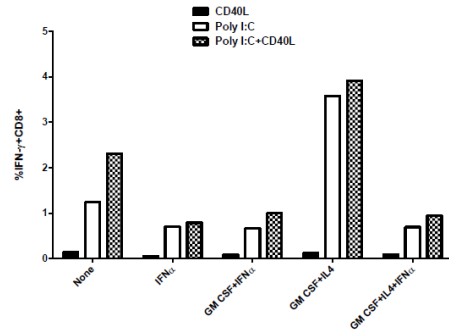

**B**

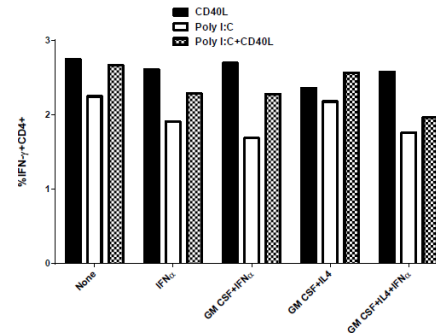

**C**

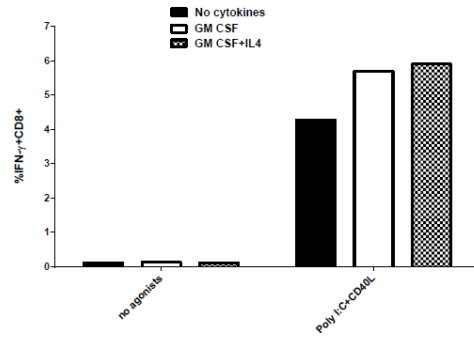

**D**

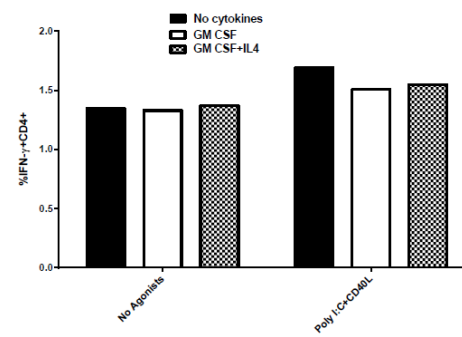

**E**

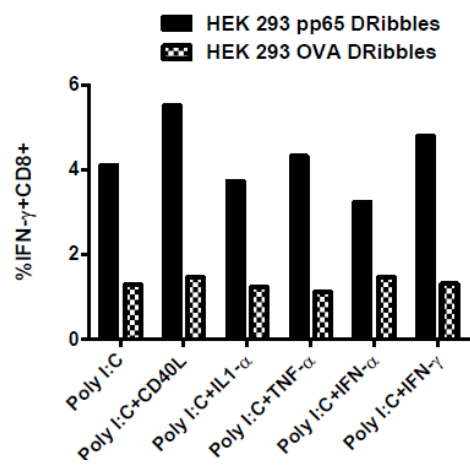

**F**

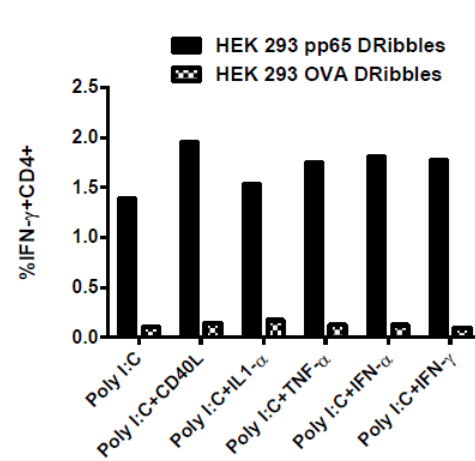

Supplement: MOESM3 [file 9574878]
